# Supplementary material
Source: PubMed Central journal article supplement (PMC11165672)
Supplement: NIHMS1986683-supplement-2.pdf [file NIHMS1986683-supplement-2.pdf]

**Supplementary information**

---

**Three families of Asgard archaeal viruses identified in metagenome-assembled genomes**

---

In the format provided by the authors and unedited

## SUPPLEMENTARY INFORMATION

### Supplementary text

#### Enigmatic MGEs of asgardarchaea

Two circular contigs, 7H\_11 and 8H\_18, were nearly identical and targeted by identical spacers affiliated to Thorarchaea (Tables S3 and S4), but were assembled from metagenomes originating from samples collected at different depths (59.5 and 68.8 mbsf, respectively). Notably, 7H\_42 discovered in our samples from the offshore Shimokita Peninsula, Japan was found to be related to Ga0114923\_10000127 and Ga0209976\_10000148 originating from the sediment samples from the Sumatra, Indian Ocean (Fig. S1), attesting to the consistency of this emerging group of Asgard MGEs.

The seven MGEs encode diverse proteins involved in DNA replication, repair and metabolism, which are common in MGE and viral genomes but, with the exception of 7H\_42, Ga0114923\_10000127 and Ga0209976\_10000148 which form a group, display little overlap in gene content (see below). Nevertheless, 8H\_18, 10H\_0 and 7H\_42 encode Topo mini-A homologs. Phylogenetic analysis of these proteins showed that, whereas 10H\_0 and 7H\_42 formed a clade with the Topo mini-A of *WyrDV4*, 7H\_42 branched among other archaeal sequences (Extended Data 4), suggestive of active exchange of Topo mini-A genes among archaeal viruses and MGEs. The 10H\_0 and 7H\_42-like MGEs as well as *verdandiviruses* and *wyrdiviruses* encode multiple non-orthologous Zn-finger proteins, which might be involved in transcription regulation or mediate protein-protein interactions. 10H\_0 and 7H\_42-like MGEs also share homologs of proliferating cellular nuclear antigen (PCNA) and transcription initiation factor B (TFB) (Fig. S1), both of which have been previously identified in archaeal viruses. For instance, PCNA is encoded by several tailed archaeal viruses infecting halophilic archaea<sup>1,2</sup> and spindle-shaped viruses of *Nitrososphaeria*<sup>3</sup>, whereas TFB homologs are encoded by certain rod-shaped viruses infecting hyperthermophilic *Thermoproteota*<sup>4</sup>. 10H\_0 also encodes Cdc6/Orc1-like origin recognition protein, nucleoside 2-deoxyribosyltransferase, DNA lyase, MazG-like nucleotide pyrophosphohydrolase and bifunctional (p)ppGpp synthase/hydrolase as well as several DNA methyltransferases and nucleases. By contrast, 7H\_42-like MGEs encode a DNA primase-superfamily 3 helicase fusion protein that are commonly found in diverse MGEs including diverse *varidnaviruses* infecting eukaryotes, a Rad51-like recombinase, several nucleases and chromatin-associated proteins containing the HMG domain. The larger elements also encode auxiliary metabolic genes, including PAPS reductase, sulfatase, methylthiotransferase, and enzymes involved in carbohydrate metabolism, which could boost the metabolic activities of the respective hosts. For the smaller contigs, 8H\_18 and 8H\_67, the vast majority of genes were refractory to functional annotation even using the most sensitive available sequence similarity detection tools, such as HHpred<sup>5</sup>.

#### Auxiliary gene content of asgardarchaeal viruses

By dsDNA virus standards, genomes of *verdandiviruses*, *skuldviruses* and *wyrdiviruses* are relatively small ( $\leq 20$  kb). Thus, the corresponding gene contents are streamlined to include largely the core functions required for virion morphogenesis and genome replication. Nevertheless, some of these viruses encode auxiliary functions, including metabolic genes. In particular, *verdandivirus VerdaV1* (and 10H\_0 MGE) encode phosphoadenosine phosphosulfate (PAPS) reductase (also known as CysH), an enzyme reducing 3'-phosphoadenylylsulfate to phosphoadenosine-phosphate using thioredoxin as an electron donor. PAPS reductases have been previously identified in certain bacteriophages<sup>6-8</sup> and tailed haloarchaeal viruses<sup>1</sup>, where they are thought to confer selective advantage to the host cells through facilitating sulfur metabolism and/or synthesis of sulfur-containing amino acids<sup>7</sup>. PAPS reductase of *VerdaV1* might perform a similar function.

*Wyrdiviruses WyrDV2* and *WyrDV6* carry a block of three genes coding for dUTPase, thymidylate synthase X (ThyX) and an uncharacterized protein that is conserved in some phages and is annotated as nucleotide modification associated domain 1 protein (PF07659.13, DUF1599) (Fig. 5). This putative operon is likely to be involved in the biosynthesis of thymidylate from dUTP, to increase the pool of nucleotides available for the synthesis of viral DNA. *WyrDV3* encodes a homolog of the nucleoside pyrophosphohydrolase MazG, which in bacteria prevents programmed cell death by degrading the central alarmone, ppGpp<sup>9</sup>. MazG is highly conserved in tailed bacteriophages infecting cyanobacteria<sup>10</sup>. Biochemical characterization of a cyanophage MazG has shown that, instead of degrading ppGpp, it preferentially hydrolyses dGTP and dCTP<sup>11</sup>. Thus, MazG homolog in *WyrDV3* might either function in disarming antiviral systems triggered by nucleotide-based alarmones, such as ppGpp, or in adjusting the intracellular nucleotide concentrations for optimal viral genome synthesis. Notably,

MazG homologs are also encoded by asgardarchaeal MGEs 10H\_0, 7H\_42, Ga0114923\_10000127 and Ga0209976\_10000148 (Fig. S2).

None of the known archaeal viruses encodes its own RNA polymerase<sup>12</sup>. Nevertheless, various transcription regulators with HTH, Zn-finger or ribbon-helix-helix domains are abundantly encoded in archaeal virus genomes<sup>13</sup>. This is also the case with asgardarchaeal viruses described herein. Verdandiviruses and wyrdviruses encode multiple non-orthologous Zn-finger proteins, whereas skuldviruses encode several proteins with HTH domains (Fig. 4a). In addition, WyrdV1 (as well as 10H\_0, 7H\_42, Ga0114923\_10000127 and Ga0209976\_10000148) encodes a transcription initiation factor B (TFB), a homolog of eukaryotic TFIIB, which guides the initiation of RNA transcription<sup>14</sup>. Among archaeal viruses, TFB homologs have been previously identified only in certain rod-shaped viruses infecting hyperthermophilic archaea<sup>4</sup>. Thus, Asgard viruses appear to fully rely on the core transcription machinery of their hosts but encode various transcription factors that could be involved in the recruitment of this machinery for expression of viral genes as well as in the regulation of virus gene transcription. As mentioned above, some of the genes regulated by these transcription factors are likely to encode antidefense proteins.

WyrdV1 and WyrdV3 encode homologs of the carbohydrate-specific 3'-O-methyltransferase<sup>15</sup>. In many archaeal viruses, the structural proteins are glycosylated by either the virus or host encoded glycosyltransferases, although the biological role of this post-translational modification remains unclear. The methyltransferase of WyrdV1 and WyrdV3 could participate in modification of the glycans attached to the virion proteins.

### Supplementary references

- 1 Mizuno, C. M. *et al.* Novel haloarchaeal viruses from Lake Retba infecting Haloferax and Halorubrum species. *Environ Microbiol* **21**, 2129-2147, doi:10.1111/1462-2920.14604 (2019).
- 2 Raymann, K., Forterre, P., Brochier-Armanet, C. & Gribaldo, S. Global phylogenomic analysis disentangles the complex evolutionary history of DNA replication in archaea. *Genome Biol Evol* **6**, 192-212, doi:10.1093/gbe/evu004 (2014).
- 3 Kim, J. G. *et al.* Spindle-shaped viruses infect marine ammonia-oxidizing thaumarchaea. *Proc Natl Acad Sci U S A* **116**, 15645-15650, doi:10.1073/pnas.1905682116 (2019).
- 4 Baquero, D. P. *et al.* New virus isolates from Italian hydrothermal environments underscore the biogeographic pattern in archaeal virus communities. *ISME J* **14**, 1821-1833, doi:10.1038/s41396-020-0653-z (2020).
- 5 Gabler, F. *et al.* Protein Sequence Analysis Using the MPI Bioinformatics Toolkit. *Curr Protoc Bioinformatics* **72**, e108, doi:10.1002/cpbi.108 (2020).
- 6 Mara, P. *et al.* Viral elements and their potential influence on microbial processes along the permanently stratified Cariaco Basin redoxcline. *ISME J* **14**, 3079-3092, doi:10.1038/s41396-020-00739-3 (2020).
- 7 Summer, E. J., Gill, J. J., Upton, C., Gonzalez, C. F. & Young, R. Role of phages in the pathogenesis of Burkholderia, or 'Where are the toxin genes in Burkholderia phages?'. *Curr Opin Microbiol* **10**, 410-417, doi:10.1016/j.mib.2007.05.016 (2007).
- 8 Farlow, J. *et al.* Genomic characterization of three novel Basilisk-like phages infecting Bacillus anthracis. *BMC Genomics* **19**, 685, doi:10.1186/s12864-018-5056-4 (2018).
- 9 Gross, M., Marianovsky, I. & Glaser, G. MazG -- a regulator of programmed cell death in Escherichia coli. *Mol Microbiol* **59**, 590-601, doi:10.1111/j.1365-2958.2005.04956.x (2006).
- 10 Sullivan, M. B. *et al.* Genomic analysis of oceanic cyanobacterial myoviruses compared with T4-like myoviruses from diverse hosts and environments. *Environ Microbiol* **12**, 3035-3056, doi:10.1111/j.1462-2920.2010.02280.x (2010).
- 11 Rihtman, B. *et al.* Cyanophage MazG is a pyrophosphohydrolase but unable to hydrolyse magic spot nucleotides. *Environ Microbiol Rep* **11**, 448-455, doi:10.1111/1758-2229.12741 (2019).
- 12 Krupovic, M., Cvirkaite-Krupovic, V., Iranzo, J., Prangishvili, D. & Koonin, E. V. Viruses of archaea: Structural, functional, environmental and evolutionary genomics. *Virus Res* **244**, 181-193, doi:10.1016/j.virusres.2017.11.025 (2018).
- 13 Iranzo, J., Koonin, E. V., Prangishvili, D. & Krupovic, M. Bipartite network analysis of the archaeal virosphere: Evolutionary connections between viruses and capsidless mobile elements. *J Virol* **90**, 11043-11055, doi:10.1128/JVI.01622-16 (2016).
- 14 Werner, F. & Grohmann, D. Evolution of multisubunit RNA polymerases in the three domains of life. *Nat Rev Microbiol* **9**, 85-98, doi:10.1038/nrmicro2507 (2011).
- 15 Bernard, S. M. *et al.* Structural basis of substrate specificity and regiochemistry in the MycF/TyIF family of sugar O-methyltransferases. *ACS Chem Biol* **10**, 1340-1351, doi:10.1021/cb5009348 (2015).

## Supplementary figures

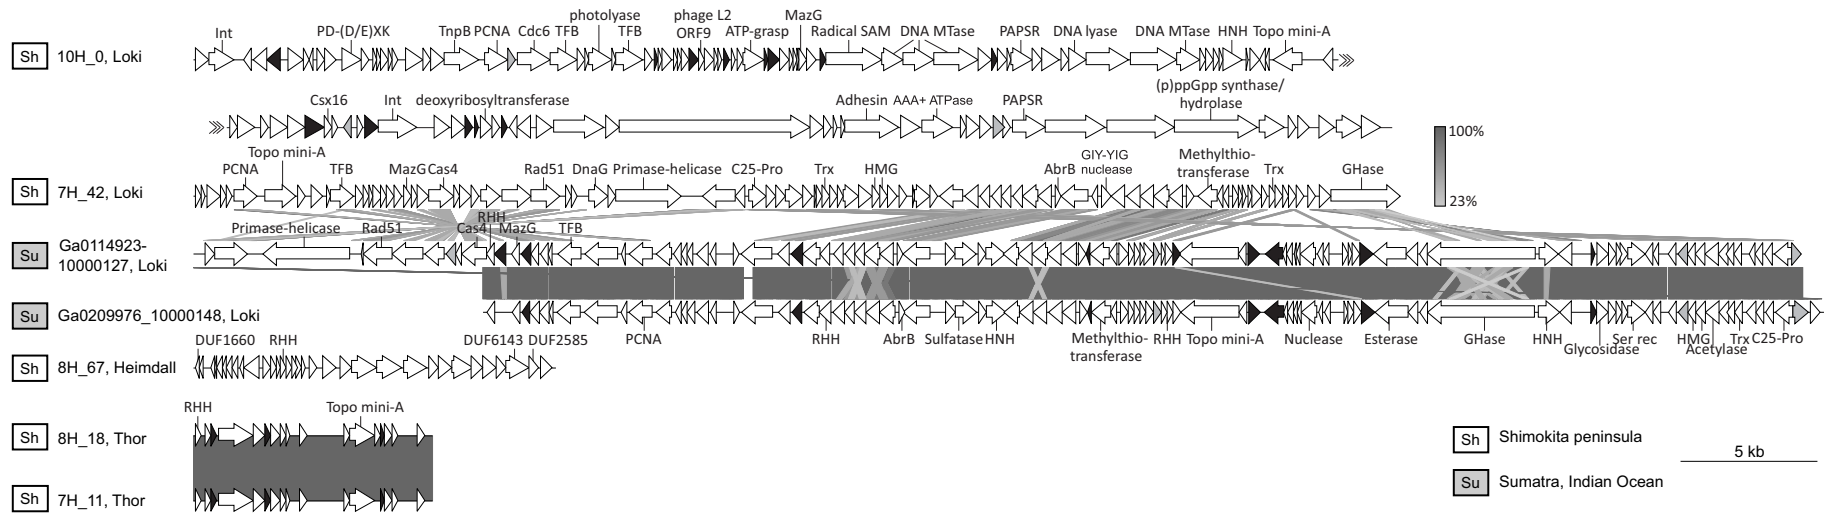

**Figure S1. Genome maps of asgardarchaeal CRISPR-targeted MGEs.** Due to the lack of known virus hallmark genes, the MGEs are not identified as viruses, but could represent novel virus groups. Genes encoding putative DNA-binding proteins with Zn-binding and helix-turn-helix domains are colored in black and grey, respectively. Grey shading connects genes displaying sequence similarity at the protein level, with the percent of sequence identity depicted with different shades of grey. Abbreviations: Int, integrase; PD-(D/E)XK, PD-(D/E)XK family nuclease; PCNA, proliferating cellular nuclear antigen; TFB, transcription initiation factor B; MTase, methyltransferase; HNH, HNH family nuclease; PAPSr, phosphoadenosine phosphosulfate reductase; C25-Pro, C25-family protease; Trx, thioredoxin; GHase, glycoside hydrolase; RHH, ribbon-helix-helix domain-containing DNA binding protein; Ser rec, serine superfamily recombinase; HMG, high mobility group domain-containing chromatin-associated protein.







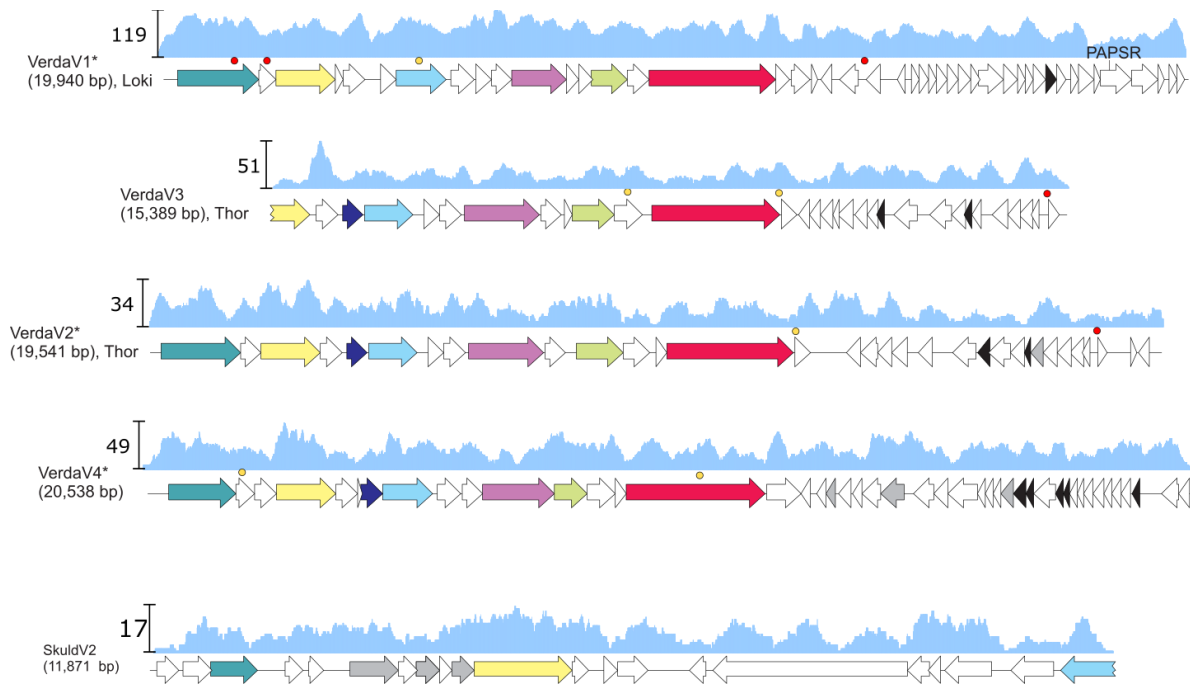

**Figure S4. Read depth along viral contigs.** The scale on the left shows the maximal coverage for each contig. The open reading frames are colored the same way as in the corresponding Figures 3 and 4 for verdandiviruses and skuldviruses, respectively. Colored circles represent the positions of protospacers targeted by asgardarchaeal CRISPR spacers.

**Supplementary Data 1.** Output of CRISPRDetect output for CRISPR arrays analyzed in this work.
